# Supplementary material for: Line defects and induced doping effects in graphene, hexagonal boron nitride and hybrid BNC
Source: Royal Society of Chemistry journal article supplement (doi:10.1039/c4cp02552k), 2014-01-01

*Supplementary Information for manuscript*

**Line Defects and Induced Doping Effects in Graphene,  
Hexagonal Boron Nitride and Hybrid BNC**

Narjes Ansari<sup>1</sup>, Fariba Nazari<sup>1,2</sup>, Francesc Illas<sup>3</sup>

<sup>1</sup>*Department of Chemistry, Institute for Advanced Studies in Basic Sciences, Zanjan 45137-66731, Iran*

<sup>2</sup>*Center of Climate Change and Global Warming, Institute for Advanced Studies in Basic Sciences, Zanjan 45137-66731, Iran*

<sup>3</sup>*Departament de Química Física & Institut de Química Teòrica i Computacional (IQTCUB), Universitat de Barcelona, C/Martí i Franquès 1, 08028 Barcelona, Spain*

**Table 1S:** Structures, composition and abbreviated names of O-I and its BN-doped structures in two *A* and *Z* directions.

| Name                                                      | Symbol for Names | Structure                                                                            |
|-----------------------------------------------------------|------------------|--------------------------------------------------------------------------------------|
| G-585-ELD                                                 | O-I              | 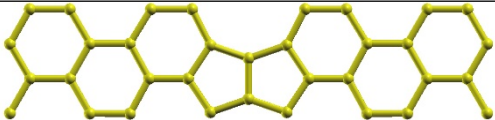   |
| BN-585-ELD                                                | O-II             |    |
| Doping of 585 ELD in <i>A</i> direction                   |                  |                                                                                      |
| A-B <sub>4</sub> N <sub>4</sub> C <sub>26</sub> -585-ELD  | OA-I             |    |
| A-B <sub>5</sub> N <sub>5</sub> C <sub>24</sub> -585-ELD  | OA-II            |    |
| A-B <sub>9</sub> N <sub>9</sub> C <sub>16</sub> -585-ELD  | OA-III           |    |
| A-B <sub>13</sub> N <sub>13</sub> C <sub>8</sub> -585-ELD | OA-IV            |   |
| Doping of 585 ELD in <i>Z</i> direction                   |                  |                                                                                      |
| Z-B <sub>4</sub> N <sub>4</sub> C <sub>26</sub> -585-ELD  | OZ-I             |  |
| Z-B <sub>8</sub> N <sub>8</sub> C <sub>18</sub> -585-ELD  | OZ-II            |  |
| Z-B <sub>9</sub> N <sub>9</sub> C <sub>16</sub> -585-ELD  | OZ-III           |  |
| Z-B <sub>13</sub> N <sub>13</sub> C <sub>8</sub> -585-ELD | OZ-IV            |  |

**Table 2S:** Structures, composition and abbreviated names of H-I and its BN-doped structures in two *A* and *Z* directions.

| Name                                                        | Symbol for Names | Structure |
|-------------------------------------------------------------|------------------|-----------|
| G-5775-ELD                                                  | H-I              |           |
| BN-5775-ELD                                                 | H-II             |           |
| Doping of 5775 ELD in <i>A</i> direction                    |                  |           |
| A-B <sub>8</sub> N <sub>8</sub> C <sub>34</sub> -5775-ELD   | HA-I             |           |
| A-B <sub>16</sub> N <sub>16</sub> C <sub>18</sub> -5775-ELD | HA-II            |           |
| A-B <sub>17</sub> N <sub>17</sub> C <sub>16</sub> -5775-ELD | HA-III           |           |
| Doping of 5775 ELD in <i>Z</i> direction                    |                  |           |
| Z-B <sub>6</sub> N <sub>6</sub> C <sub>38</sub> -5775-ELD   | HZ-I             |           |
| Z-B <sub>12</sub> N <sub>12</sub> C <sub>26</sub> -5775-ELD | HZ-II            |           |

|                                  |        |                                                                                                                                                                                                                                                                                                                                                                                                                                                      |
|----------------------------------|--------|------------------------------------------------------------------------------------------------------------------------------------------------------------------------------------------------------------------------------------------------------------------------------------------------------------------------------------------------------------------------------------------------------------------------------------------------------|
| $Z-B_{13}N_{13}C_{24}$ -5775-ELD | HZ-III | 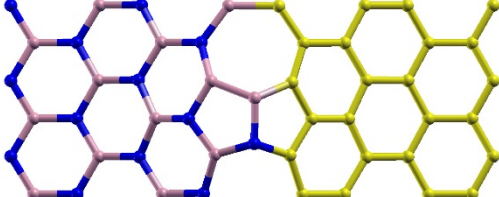 A ball-and-stick model of a layered carbon-based structure. The structure consists of a central layer of interconnected hexagonal rings, with additional layers above and below. The atoms are color-coded: blue for nitrogen, pink for boron, and yellow for carbon. The central layer shows a mix of these colors, while the outer layers are primarily yellow. |
| $Z-B_{19}N_{19}C_{12}$ -5775-ELD | HZ-IV  |  A ball-and-stick model of a layered carbon-based structure, similar to the one above. It features a central layer of hexagonal rings with additional layers above and below. The atoms are color-coded: blue for nitrogen, pink for boron, and yellow for carbon. The central layer has a different composition of colors compared to the first structure.        |

**Table 3S:** Structures, composition and abbreviated names of G and its BN-doped structures in two *A* and *Z* directions (Counterpart of O-I and its BN-doped structures).

| Name                                             | Symbol for Names | Structure                                                                            |
|--------------------------------------------------|------------------|--------------------------------------------------------------------------------------|
| G                                                | PP0              | 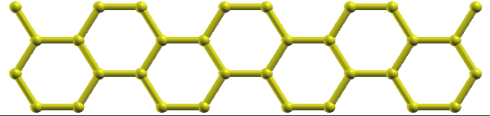   |
| <i>h</i> -BN                                     | PP1              |    |
| Doping of G in <i>A</i> direction                |                  |                                                                                      |
| A-B <sub>4</sub> N <sub>4</sub> C <sub>24</sub>  | PA-I             |    |
| A-B <sub>8</sub> N <sub>8</sub> C <sub>16</sub>  | PA-II            |    |
| A-B <sub>12</sub> N <sub>12</sub> C <sub>8</sub> | PA-III           |    |
| Doping of G in <i>Z</i> direction                |                  |                                                                                      |
| Z-B <sub>4</sub> N <sub>4</sub> C <sub>24</sub>  | PZ-I             |  |
| Z-B <sub>8</sub> N <sub>8</sub> C <sub>16</sub>  | PZ-II            |  |
| Z-B <sub>12</sub> N <sub>12</sub> C <sub>8</sub> | PZ-III           |  |

**Table 4S:** Structures, composition and abbreviated names of G and its BN-doped structures in two *A* and *Z* directions (Counterpart of H-I and its BN-doped structures).

| Name                                              | Symbol for Names | Structure                                                                            |
|---------------------------------------------------|------------------|--------------------------------------------------------------------------------------|
| G                                                 | PP0'             | 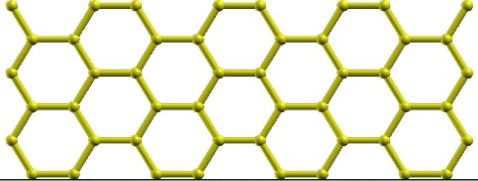   |
| <i>h</i> -BN                                      | PP1'             |    |
| Doping of G in <i>A</i> direction                 |                  |                                                                                      |
| A-B <sub>8</sub> N <sub>8</sub> C <sub>32</sub>   | PA-I'            |   |
| A-B <sub>16</sub> N <sub>16</sub> C <sub>16</sub> | PA-II'           |  |
| Doping of G in <i>Z</i> direction                 |                  |                                                                                      |
| Z-B <sub>6</sub> N <sub>6</sub> C <sub>36</sub>   | PZ-I'            |  |
| Z-B <sub>12</sub> N <sub>12</sub> C <sub>18</sub> | PZ-II'           |  |
| Z-B <sub>18</sub> N <sub>18</sub> C <sub>12</sub> | PZ-III'          |  |

**Figure. 1S:** Top and side views models of initial (a) and (d), relaxed (b) and (e) and full relaxed structures (c) and (f) of  $C_2$  ad-dimers linear adsorption on G sheet for embedded 585-ELD and 5775-ELD structures, respectively.

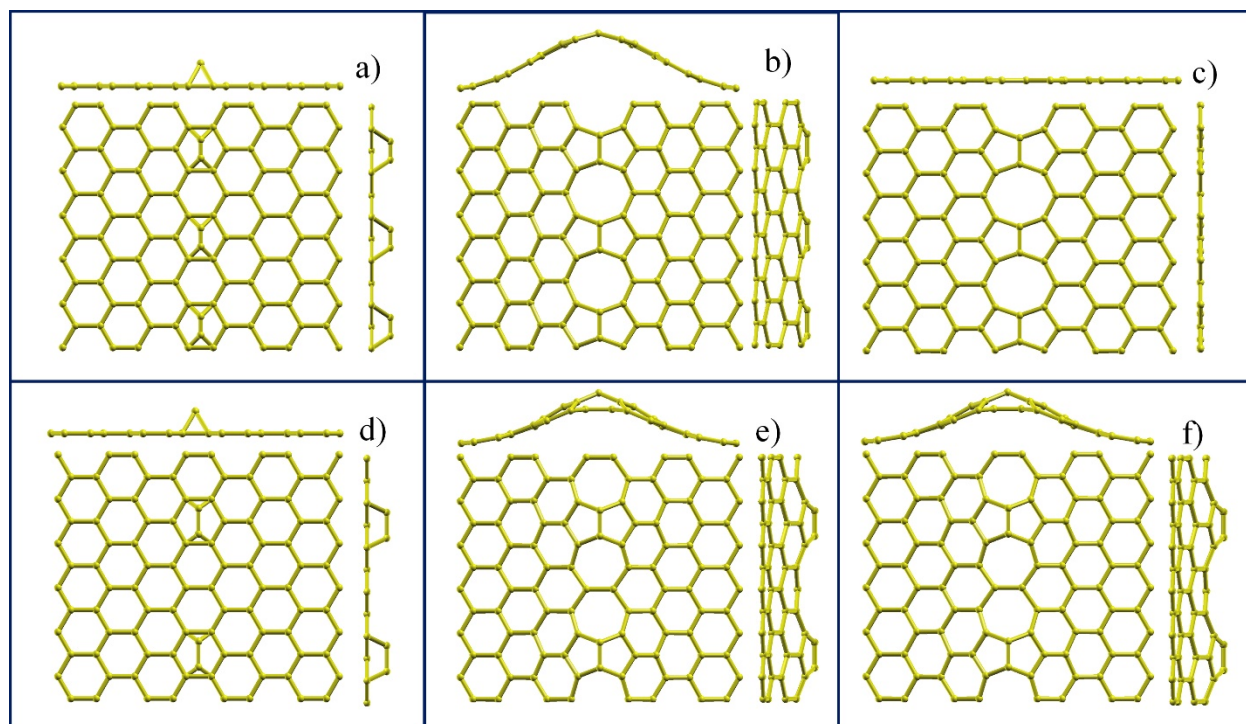



**Figure. 2S:** Unit cell of (a) 585 ELD along with rings label, ELD, *A* and *Z* directions, (b) 5775 ELD along with rings label, ELD, *A* and *Z* directions and (c) and (d) show zigzag N-edge and zigzag B-edge in both BN 585- and BN 5775-ELD structures (e) ( $L_c$ ) . Length of the circumscribing ring 10.

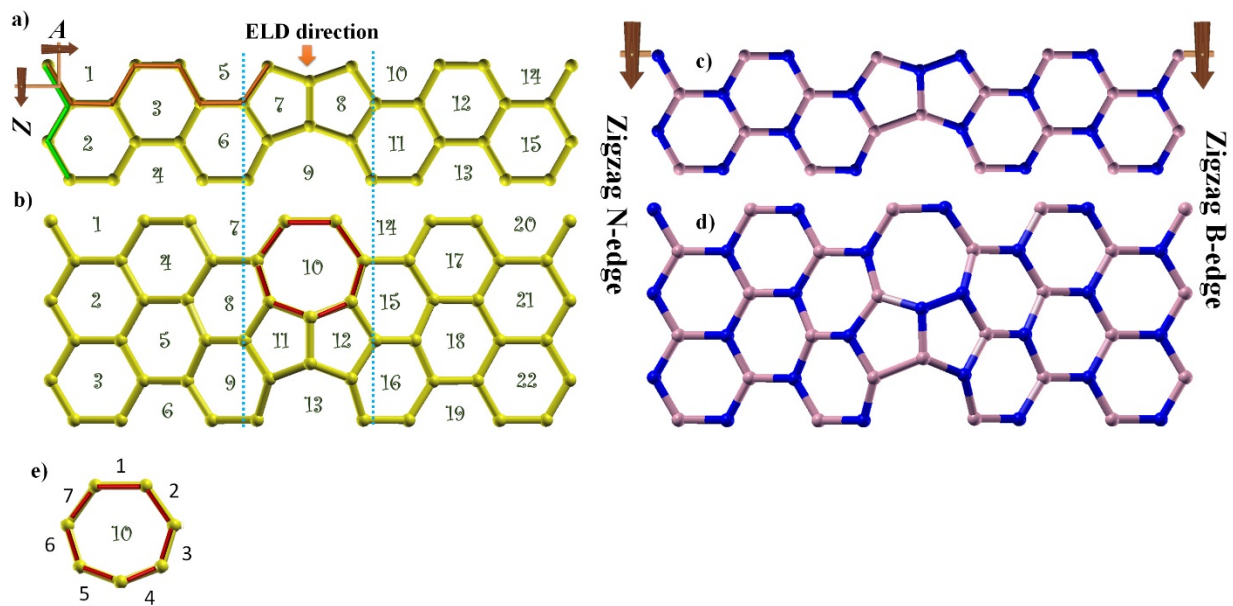



**Figure. 3S:** Electronic band structures of (a) G sheet along with VEBS and CEBS states and (b) *h*-BN sheet along with VEBS and CEBS states, total density of states for G sheet (projected density of state of 2p orbitals C atoms (inset)) (c) and (d) for *h*-BN sheet (projected density of state of 2p orbitals of B and N atoms (inset)), EPS plots mapped onto electron density values with isodensity values of 0.004 a.u. of (e) G sheet and (f) *h*-BN sheet.

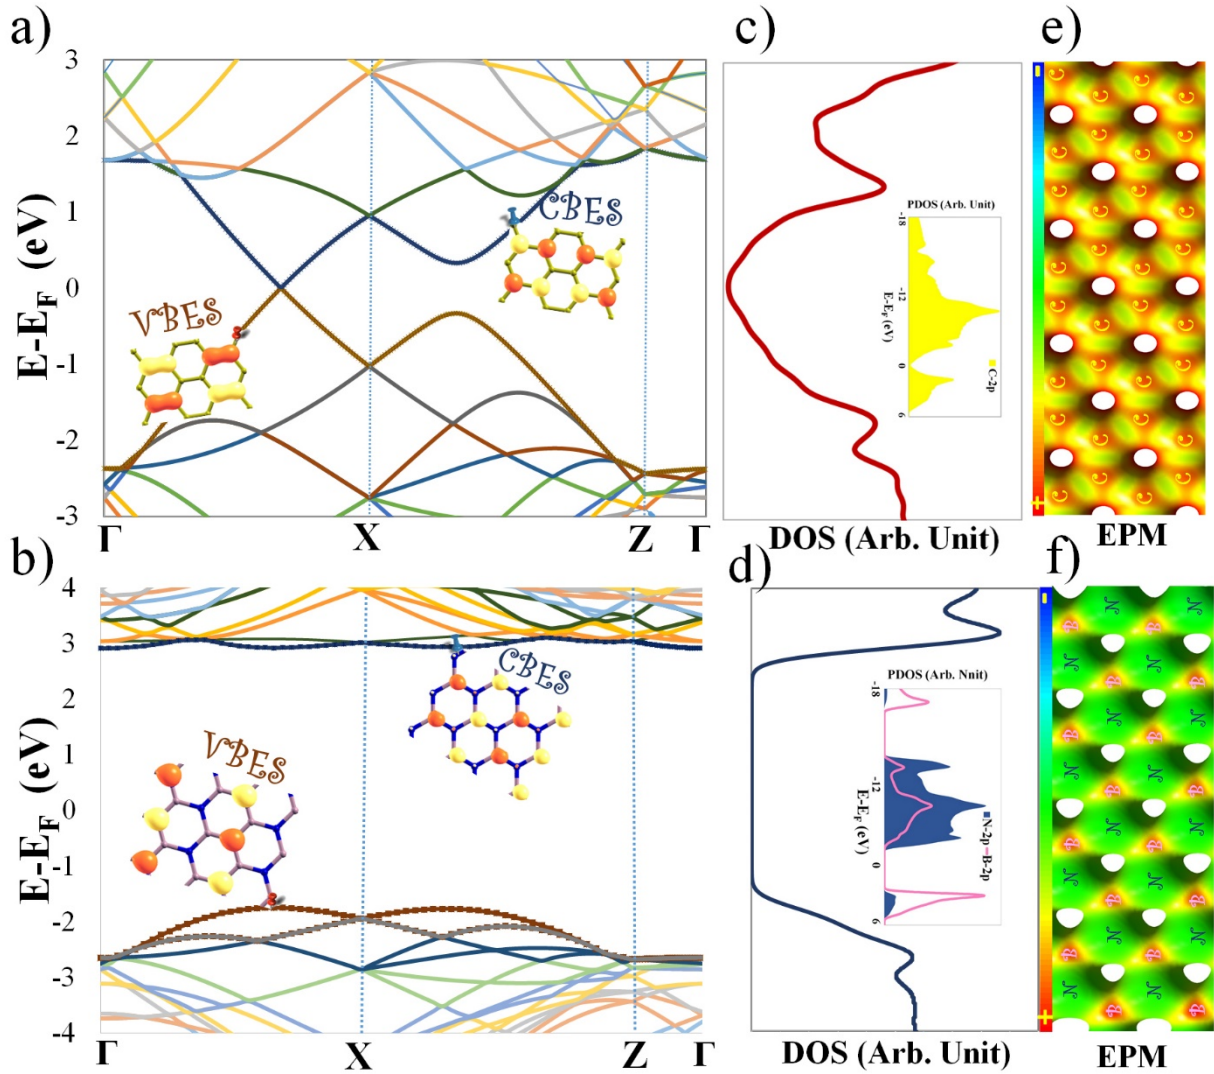

**Figure. 4S:** Conductance as a function of the energy (the Fermi energy  $E_F$  is set to zero) for the O-I and H-I structures.

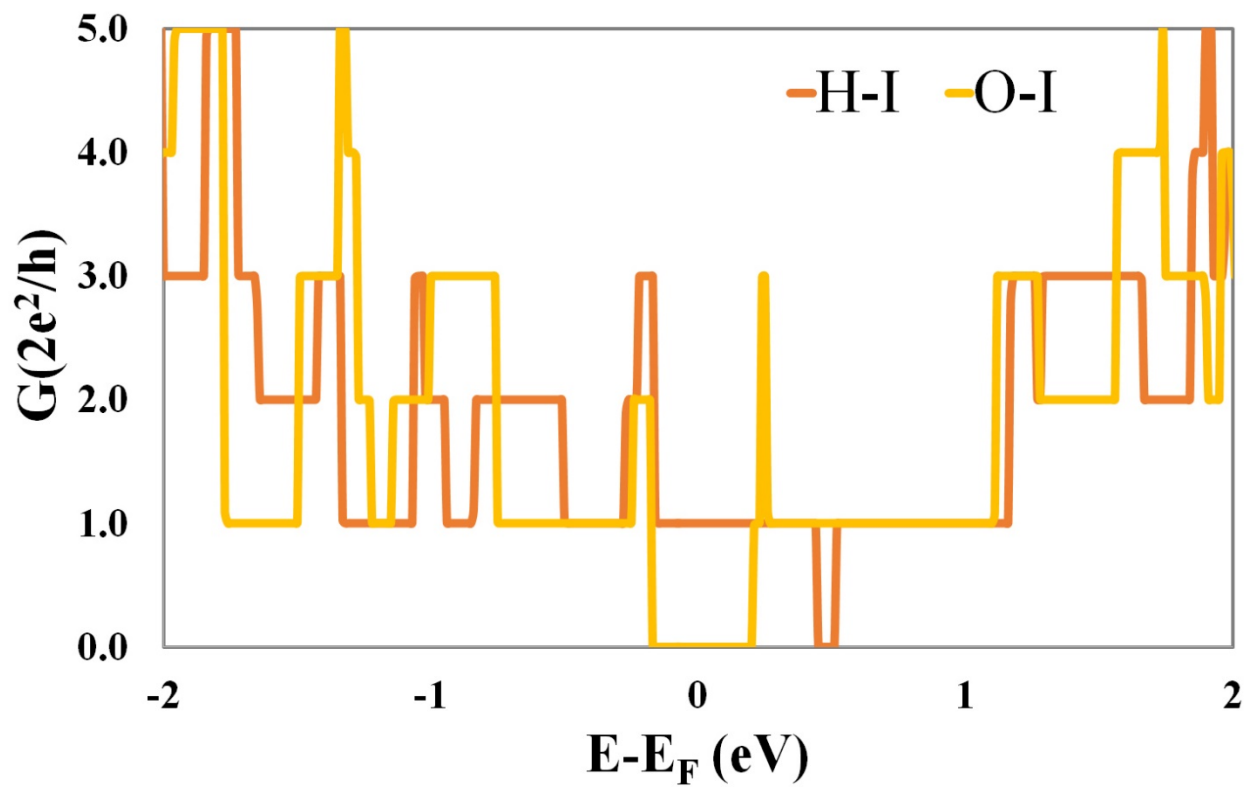

**Figure. 5S.** Length of the circumscribing rings in (a) O-I and (b) H-I structures.

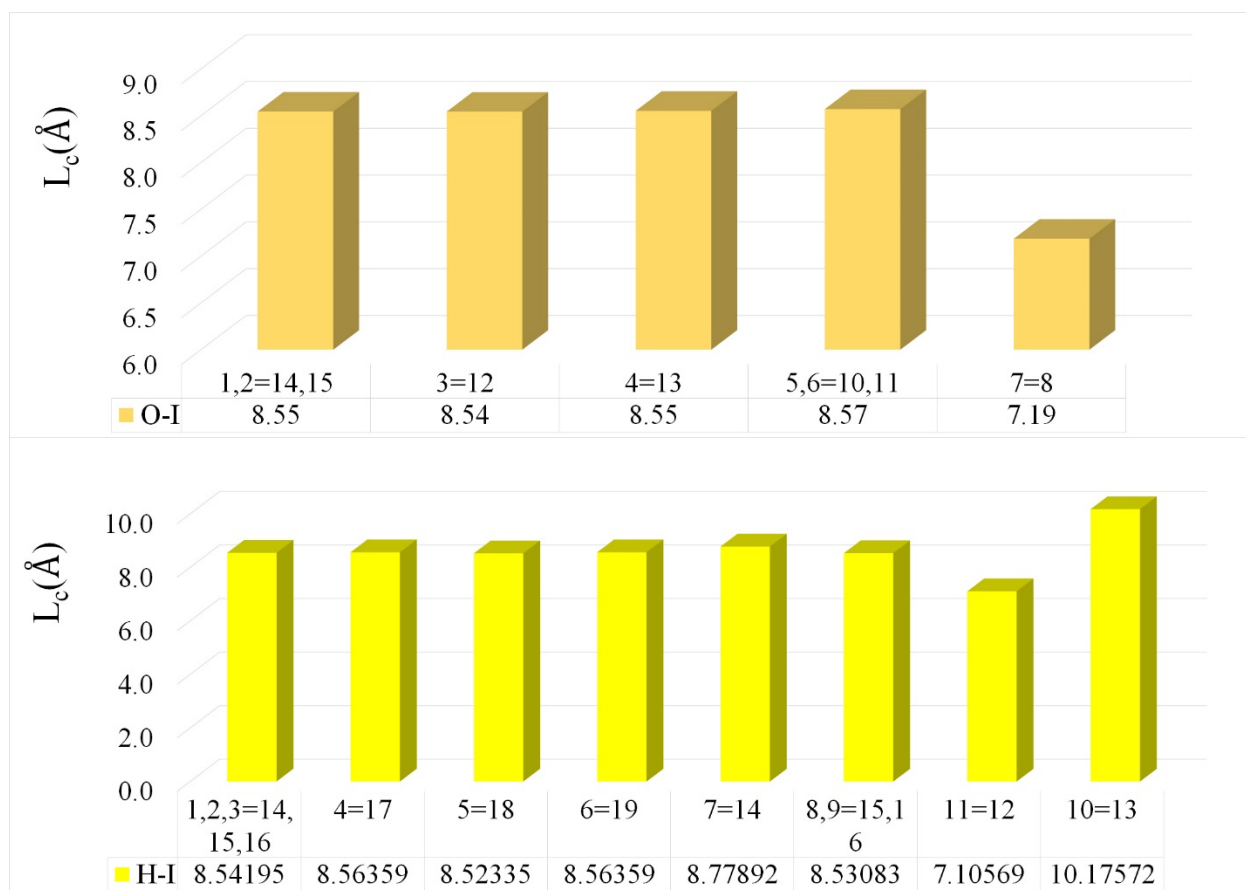

**Figure 6S.** Relative cohesive energy per atom with respect to pristine graphene sheet (Counterpart of O-I and its BN-doped structures), band gap and full relaxed unit cells of G sheet and its different BN-doped structures in two *A* and *Z* directions.

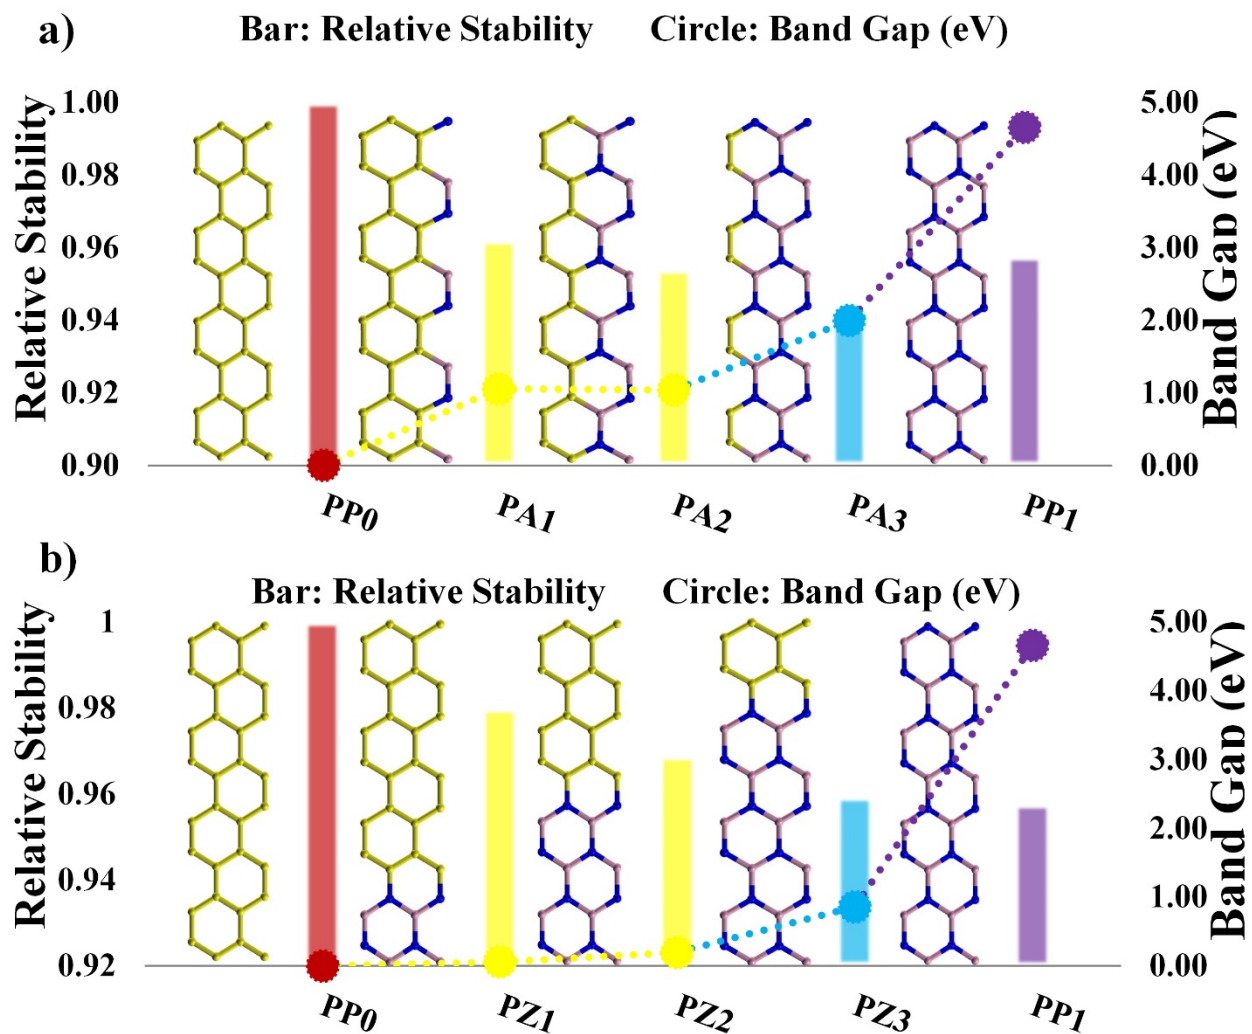

**Figure 7S.** Relative cohesive energy per atom with respect to pristine graphene sheet (Counterpart of H-I and its BN-doped structures), band gap and full relaxed unit cells of G sheet and its different BN-doped structures in two *A* and *Z* directions.

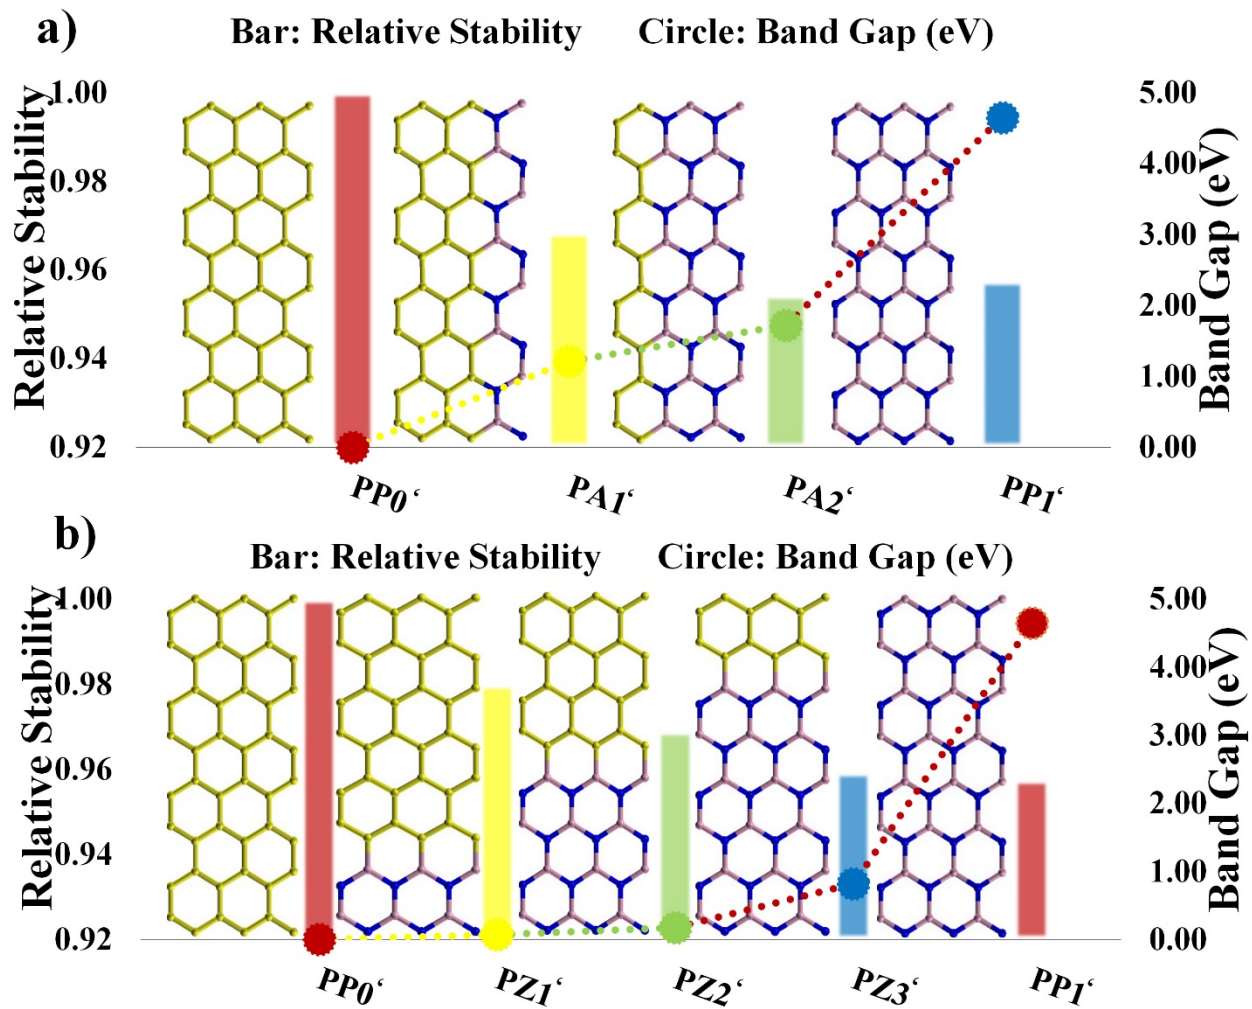

Supplement: c4cp02552k1.pdf [file c4cp02552k1.pdf]
